# Supplementary material for: The treaty of Versailles, 80 years on.
Source: eLife journal article supplement (doi:10.7554/elife.63049), 2001-04-01
Supplement: supp [file elife-63049-supp-v1.zip]

Archive with 17 entries (17 files):
- elife_poa_e63049_Figure_1_figure_supplement_1.pdf
- elife_poa_e63049_Figure_2_figure_supplement_1.pdf
- elife_poa_e63049_Figure_2_figure_supplement_2.pdf
- elife_poa_e63049_Figure_2_figure_supplement_3.pdf
- elife_poa_e63049_Figure_3_figure_supplement_1.pdf
- elife_poa_e63049_Figure_4_figure_supplement_1.pdf
- elife_poa_e63049_Figure_4_figure_supplement_2.pdf
- elife_poa_e63049_Transparent_Reporting_File.docx
- elife_poa_e63049_Figure_2_source_data_1.xlsx
- elife_poa_e63049_Figure_3_source_data_1.xlsx
- elife_poa_e63049_Figure_4_source_data_1.xlsx
- elife_poa_e63049_Figure_1_figure_supplement_1_source_data_1.xlsx
- elife_poa_e63049_Figure_2_figure_supplement_2_source_data_1.xlsx
- elife_poa_e63049_Figure_2_figure_supplement_3_source_data_1.xlsx
- elife_poa_e63049_Figure_3_figure_supplement_1_source_data_1.xlsx
- elife_poa_e63049_Figure_4_figure_supplement_1_source_data_1.xlsx
- elife_poa_e63049_Figure_4_figure_supplement_2_source_data_1.xlsx
