# Supplementary material for: The treaty of Versailles, 80 years on.
Source: eLife journal article supplement (doi:10.7554/elife.63049), 2001-04-01
Supplement: supp [file elife-63049-supp-v1.zip › elife_poa_e63049_Figure_1_figure_supplement_1_source_data_1.xlsx]

## Sheet: Figure1- figure supplement 1B
Total	Akh	Piezo	Gr43a
45	35	5	7
26	8	7	3
34	22	3	4
34	23	5	5
37	17	7	4
30	23	6	3
30	18	7	6
34	20	9
38	20	8
37	21	5
