# Supplementary material for: The treaty of Versailles, 80 years on.
Source: eLife journal article supplement (doi:10.7554/elife.63049), 2001-04-01
Supplement: supp [file elife-63049-supp-v1.zip › elife_poa_e63049_Figure_2_figure_supplement_2_source_data_1.xlsx]

## Sheet: Figure2- figure supplement 2C
Esg>+	+>Trpa1	Piezo>Trpa1	Esg>Trpa1
2.333	1.917	0.833	1.818
1.5	2.151	1.091	2.625
2.083	1.833	1.333	2.333
1.667	2.373	1.4	2
1.417	1.917	1.583	1.667
1.364	2.462	0.778	1.7
1.583	1.455	0.9	1.462
1.3	1.727	0.444	2.1
	2	1
	1.909
	1.889
	1.4
	1.818
	1.333
