# Supplementary material for: The treaty of Versailles, 80 years on.
Source: eLife journal article supplement (doi:10.7554/elife.63049), 2001-04-01
Supplement: supp [file elife-63049-supp-v1.zip › elife_poa_e63049_Figure_2_figure_supplement_3_source_data_1.xlsx]

## Sheet: Figure2- figure supplement 3C
PI (Total)		PI (Dilp2+)		HCG
Piezo>CD8RFP	Piezo>CD8RFP, Cha-Gal80	Piezo>CD8RFP	Piezo>CD8RFP, Cha-Gal80	Piezo>CD8RFP	Piezo>CD8RFP, Cha-Gal80
7	5	2	0	5	4
3	2	0	0	7	4
6	4	4	2	4	7
10	6	0	0	5	6
5	3	1	1	6	5
5	2	0	0	6	2
0	0	0	0	8	4
3	1	2	0	9	8
				6	6
				6	6
					5
