# Supplementary material for: The treaty of Versailles, 80 years on.
Source: eLife journal article supplement (doi:10.7554/elife.63049), 2001-04-01
Supplement: supp [file elife-63049-supp-v1.zip › elife_poa_e63049_Figure_2_source_data_1.xlsx]

## Sheet: Figure 2B
Feeding index						Crop size
+>Shits	Piezo (59266)>Shits	Piezo (KI)>Shits	Piezo(76658)>Shits	GMR51F12>Shits		+>Shits	Piezo (59266)>Shits	Piezo (KI)>Shits	Piezo(76658)>Shits	GMR51F12>Shits
1.838	2.33	2.333	2.417	1.75		363613	666639	1.02118e+06	1260148	389787
1.833	3.58	2.75	2.833	1.909		803200	513966	703022	962077	245633
1.917	2.58	2.917	2.833	2		477094	753617	607549	387176	579153
1.909	2.38	1.667	2.67	1.75		404190	915947	909813	779616	382258
2.25	2.75	2.75	2.77	1.5		367024	647922	886935	680203	90116.2
1.5	2.58	2.833	2.75	1.417		270372	1540769	867889	869209	421146
1.846	3.17	2.75	1.364	0.727		375834	743917	669635	580227	359146
1.917	3.08	2.333	2.083	2.333		470626	673388	1431325	840357	133212
2.083	1.733	2.167	3.2	0.833		554443	1205089	898664	601102	402233
1.417	3	3.308	2.5	1.167		342830		752172
1.818	2.917	2.083				188796		454792
2	2.818					384336
1.583	2.5					355930
1
2.583
1.167

## Sheet: Figure 2C
Feeding index						Crop size
+>Trpa1	Piezo(59266)>Trpa1	Piezo(KI)>Trpa1	Piezo(76658)>Trpa1	GMR51F12>Trpa1		+>Trpa1	Piezo(59266)>Trpa1	Piezo(KI)>Trpa1	Piezo(76658)>Trpa1	GMR51F12>Trpa1
2.109	0.367	1	0.978	2.12		626387	173439	546474	174547	389787
2.45	0.575	0.867	0.857	2.42		279934	78804.9	150128	158786	245633
1.7	0.311	0.6	0.5	1.92		555624	262242	301343	274701	579153
2.109	1.291	1	0.45	2.075		903614	154514	105464	105637	79153.4
1.927	1.825	1.354	0.422	2.222		714502	66380.9	76516.5	69763.8	882258
1.889	1.367	0.838	0.333	1.575		173614	413562	23127.9	164571	679153
1.735	1.167	1.046	1.37	2.018		383948		79185.9	12687.4	479153
1.783	1.089	0.914	1.13	1.867		577163		109816	74701.1	782258
1.617	0.919	1.086	0.62	1.914		403948		245939	105637	682258
1.95	1.291	1.867	0.783	0.95		468504		101918	49763.6	579953
1.644	1.123	0.767		0.62		459963		207251		629192
1.969	1.233	1.2		1.778		428504				679221
2.018	1.152	0.99		1.29
1.836	1.242	0.333
1.633	1.325
0.95	1.111
2.6	0.745
1.28	0.473
1.7	1.533
	1.212

## Sheet: Figure 2E
Feeding index
+>Trpa1	Piezo>Trpa1	Piezo>Trpa1; Elav-Gal80	Piezo>Trpa1; Cha-Gal80
1.909	1.091	1.917	1.4
1.727	1.625	2	1.1
1.889	1.167	2	1.5
1.889	1.667	1.846	1.364
1.583	1.167	1.857	0.6
2.417	1.333	2.25	1.308
2.75	1.091	1.833	1.462
1.769	0.923	1.7	1.417
1.818	0.583	1.917	1.656
1.636	1	1.889	0.417
1.833	1.125	1.833	1.818
1.917	0.923	1.917	1.25
1.667	1.167	2	1.444
1.5	0.75	2.975	1.556
1.615	0.385		1.667
	0.692
	1
	1.071
	0.231
	0.43
