# Supplementary material for: The treaty of Versailles, 80 years on.
Source: eLife journal article supplement (doi:10.7554/elife.63049), 2001-04-01
Supplement: supp [file elife-63049-supp-v1.zip › elife_poa_e63049_Figure_3_figure_supplement_1_source_data_1.xlsx]

## Sheet: Figure3- figure supplement 1A
CaLexA index
0 Hrs	1 Hrs	7 Hrs	24 Hrs	30 Hrs
0.026	0.002	1.193	1.164	0.823
0.014	0.372	0.661	0.799	1.008
0.21	0.533	0.559	0.606	1.318
0.153	0.217	0.021	1.157	1.263
0.069	0.075	0.323	1.076	0.658
0.132	0.155	0.484	1.197	0.656
0.066	0.01	0.151	0.657	1.042
0.214	0.123	1.295	0.827	0.86
0.175	0.131	0.848	0.576	0
0.115	0.007	0.424	1.194	0.806
		0.367	0.215	0.71
		0.948		0.363
		0.759
		0.172
		1.05
		0.947
		0.987
		0.215

## Sheet: Figure3- figure supplement 1B
CaLexA index
Sucrose	Starved	Ad libitum
0.875	0.252	0.27
0.76	0.266	0.17
0.471	0.337	0.464
0.552	0.287	0.164
0.757	0.3	0.093
0.92	0.297	0.473
0.589	0.279	0.327
0.987	0.238	0.331
1.069	0.278	0.349
1	0.265	0.365
0.651	0.24	0.34
1.081	0.292	0.327
0.983	0.3	0.353
0.872	0.233	0.456
0.53	0.258	0.468
0.615	0.231	0.401
1.18	0.27	0.259
0.699	0.183	0.356
1.043	0.259	0.419
1.02	0.299	0.536
0.515	0.248	0.89
0.455	0.207	0.628
0.325	0.178	0.309
0.368	0.198	0.193
1.08	0.235	0.421
0.958	0.453	0.302
1.241	0.213	0.347
1.014	0.205	0.188
0.248	0.224	0.193
0.931	0.473	0.22
0.661	0.448	0.2
0.433	0.303	0.197
0.878	0.324	0.213
1.091	0.161	0.218
1.059	0.174	0.274
1.129	0.188	0.26
0.953	0.211	0.059
1.195	0.19	0.346
0.394	0.228	0.996
1.455	0.243	0.515
0.313	0.236	0.451
1.033	0.162	0.628
0.978	0.255	0.309
1.056	0.169	0.193
0.926	0.204
0.949	0.181
0.346	0.226
0.996	0.232
0.77	0.086
0.719	0.083
0.611	0.101
0.715	0.091
0.828	0.346
0.748	0.148
	0.182
	0.374
	0.288
	0.452
	0.32
	0.265
	0.166
	0.229
	0.151
	0.196
	0.186
	0.193
	0.216
	0.212
	0.153
	0.14
	0.213
	0.189
	0.212
	0.193
	0.198
	0.194
	0.141
	0.326
	0.345
	0.329
	0.316
	0.166

## Sheet: Figure3- figure supplement 1C
Crop size
Sucrose	Ad libitum	Starved
332726	17559.1	129274
756920	151317	44283.2
427043	193069	144185
353382	300682	43210.9
467911	140677	39771
573660	180200	59217.2
272032	123796	47546.1
549302	257478	48506.1
594014	114525	127003
603013	281204	92722.7
319576	219515	71644
249210	121111	57789.3
619240	324357	91165.1
748457	69774.8	54196.8
541293	160530	39300.4
811520	195798	49143.2
708409	112770	37869.9
	130320	166768
	100807	119500
	251703
	162634
	136883
	179942
	453396
	139131
	190349
	355420
	167630

## Sheet: Figure3- figure supplement 1D
CaLexA index
WT	Piezo KO
0.835	1.03
0.247	0.987
1.113	0.695
0.974	0.832
0.85	0.825
0.832	1.014
0.786	1.432
1.206	0.995
0.073	1.567
0.008	1.294
0.842	0.843
0.648	0.888
1.2	0.651
0.267	0.008
1.118	0.731
1.404	0.017
0.216	1.118
0.7	1.257
0.87	0.903
0.618	0.295
1.236	0.829
0.257	0.003
	0.298
