# Supplementary material for: The treaty of Versailles, 80 years on.
Source: eLife journal article supplement (doi:10.7554/elife.63049), 2001-04-01
Supplement: supp [file elife-63049-supp-v1.zip › elife_poa_e63049_Figure_3_source_data_1.xlsx]

## Sheet: Figure 3B
Gr43a neurons					Piezo neurons					Piezo-null Piezo neurons
Sucrose	Sucralose	Water	Control		Sucrose	Sucralose	Water	Control		Sucrose	Sucralose	Water	Control
1.171	0.058	0.511	0.501		1.253	0.589	0.989	0.134		0.05	0.293	0.202	0.151
0.882	0.133	0.276	0.112		1.132	0.987	1.258	0.171		0.232	0.313	0.179	0.196
0.133	0.16	0.369	0.093		1.107	1.069	1.237	0.246		0.298	0.279	0.213	0.186
1.233	0.124	0.438	0.36		1.092	1	1.066	0.272		0.311	0.285	0.181	0.193
0.364	0.054	0.31	0.292		0.8	0.651	1.046	0.127		0.283	0.298	0.188	0.216
1.159	0.062	0.12	0.419		1.14	1.081	0.558	0.252		0.294	0.229	0.197	0.212
1.092	0.058	0.12	0.342		1.221	1.153	0.958	0.266		0.183	0.286	0.232	0.153
0.517	0.059	0.103	0.379		1.579	1.044	1.241	0.337		0.246	0.176	0.299	0.198
0.318	0.071	0.105	0.171		1.458	1.37	1.014	0.287		0.158	0.192	0.265	0.235
0.631	0.053	0.108	0.196		1.079	1.031	0.248	0.3		0.145	0.277	0.286	0.453
0.403	0.057	0.086	0.239		0.664	1.482	0.931	0.297		0.162	0.403	0.298	0.213
1.077	0.119	0.115	0.468		0.49	1.155	0.661	0.47		0.144	0.277	0.384	0.205
1.118	0.184	0.12	0.228		0.735	0.983	1.135	0.281		0.152	0.292	0.29	0.224
1.311	0.161	0.097	0.24		0.743	0.872	0.691	0.209		0.254	0.375	0.349	0.473
0.773	0.197	0.075	0.23		0.767	0.53	0.593	0.286		0.139	0.221	0.365	0.448
1.216	0.07	0.084	0.633		0.793	0.615	0.908	0.289		0.106	0.253	0.34	0.303
0.828	0.119	0.067	0.161		0.234	1.18	0.749	0.256		0.078	0.442	0.327	0.324
0.883	0.065	0.058	0.13		0.715	0.699	0.463	0.705		0.133	0.343	0.353	0.14
0.361	0.079	0.059	0.109		0.841	1.043	0.968	0.209		0.184	0.268	0.456	0.213
0.672	0.099	0.034	0.165		0.515	1.02	0.898	0.186		0.157	0.201	0.338	0.189
0.776	0.088	0.047	0.167		0.443	0.515	1.021	0.184		0.237	0.122	0.374	0.212
0.518	0.075	0.052	0.116		0.374	0.455	0.959	0.234		0.141	0.217	0.29	0.193
0.784	0.105	0.059	0.103		0.516	0.325	0.25	0.279		0.338	0.312	0.402	0.198
1.142	0.068	0.038	0.117		0.627	0.368	0.962	0.238		0.128	0.238	0.306	0.194
0.328	0.085	0.045	0.149		1.096	1.08	1.326	0.278		0.168	0.215	0.281	0.141
0.871	0.345	0.048	0.134		0.954	1.033	1.256	0.265		0.161	0.235	0.242	0.326
1.027	1.025	0.034	0.107		0.658	0.978	1.146	0.24		0.174	0.209	0.325	0.345
1.203	0.101	0.052	0.181		0.654	1.056	1.064	0.292		0.188	0.215	0.322	0.329
1.364	0.408	0.043	0.062		0.819	0.926	0.946	0.3		0.211	0.167	0.261	0.316
1.208	0.102	0.038	0.058		0.582	0.949	0.544	0.228		0.19	0.176	0.248	0.166
0.646	0.768	0.038	0.075		0.294	0.346	0.936	0.151		0.228	0.055	0.261	0.138
1.138	0.082	0.043	0.064		0.475	0.996	0.89	0.154		0.243	0.223	0.265	0.163
1.076	0.082	0.038	0.08		0.643	0.909	1.54	0.157		0.236	0.422	0.268	0.23
0.912	0.122	0.06	0.08		1.504	1.318	0.918	0.169		0.162	0.216		0.136
0.718	0.06	0.053	0.087		1.025	0.958	0.945	0.193		0.255	0.412		0.223
0.964	0.067	0.06	0.066		1.19	0.795	0.628	0.146		0.169	0.148		0.175
0.799	0.076	0.048	0.074		0.991	0.976	0.309	0.136		0.204	0.182		0.174
0.725	0.102	0.173	0.068		1.003	0.822	0.193	0.224		0.181	0.374
1.359	0.216	0.189	0.072		0.805	0.286	1.163	0.276		0.226	0.288
0.191	0.102	0.177	0.058		1.193	0.286	0.299	0.215		0.232	0.452
1.064	0.133	0.249	0.087		1.024	0.977	0.876	0.241		0.207	0.32
0.523	0.327	0.229	0.096		0.854	0.965	0.703	0.216		0.153	0.265
1.643	0.318	0.214	0.085		0.144	0.892	0.338	0.222		0.161	0.166
1.027	0.193		0.098		0.578	1.172	0.661	0.149		0.118	0.229
0.579	0.268		0.079		0.875	1.215	0.354	0.166		0.433	0.328
0.531	0.221		0.072		0.76	1.148	0.313	0.149		0.42	0.55
0.506	0.235		0.083		0.471	1.076	0.848	0.142		0.722	0.423
0.781	0.132		0.063		0.552	1.022	0.375	0.153		0.482	0.317
0.365	0.172		0.053		0.757	0.283	0.433	0.303		0.498	0.54
0.493	0.567		0.062		0.92	0.665	0.226	0.251		0.342	0.225
1.119	0.181		0.067		0.682	0.29	0.878	0.233		0.439	0.384
0.409	0.178		0.145		0.644	1.062	1.091	0.258		0.282	0.246
0.328	0.223		0.111		0.701	1.02	1.059	0.231		0.265	0.154
1.434	0.104		0.103		0.77	0.295	1.129	0.27		0.171	0.283
0.838	1.066		0.076		0.339	1.047	0.953	0.183		0.182	0.399
0.728	0.464		0.089		1.052	0.775	1.195	0.26		0.086	0.217
0.971	0.327		0.074		1.28	0.854	0.394	0.299		0.083	0.369
0.909	0.226		0.109		0.755	0.749	1.455	0.248		0.101	0.24
0.92	0.183		0.101		1.314	0.517	0.313	0.207		0.091	0.249
	0.917		0.107		1.147	0.702		0.178		0.346	0.299
	0.953		0.055		1.102	0.986		0.248
	0.445		0.158					0.194
	0.117		0.121					0.272
	0.456		0.082					0.26
			0.079					0.25
			0.073					0.208
			0.087
