# Supplementary material for: The treaty of Versailles, 80 years on.
Source: eLife journal article supplement (doi:10.7554/elife.63049), 2001-04-01
Supplement: supp [file elife-63049-supp-v1.zip › elife_poa_e63049_Figure_4_figure_supplement_1_source_data_1.xlsx]

## Sheet: Figure4- figure supplement 1B
Transition index
10 min			1 hr
WT	Piezo KO	Drd KO	WT	Piezo KO	Drd KO
3	3	1	3	3	1
3	3	1	3	3	1
2	3	1	3	3	1
3	2	1	3	3	3
2	3	1	3	3	1
2	2	1	3	3	1
2	3	1	3	3	2
3	3	1	3	3	1
2	3	1	3	3	1
3	2	1	3	3	1
2	3		3	3

## Sheet: Figure4- figure supplement 1C
WT	Piezo KO	Drd KO
23203.5	329495	740943
120538	268230	344854
179526	465676	447323
173788	374900	296967
72525.3	595700	438841
229736	122542	347814
193143	287813	533295
155502	472109	265327
183124	287528	392172
94282.9	444397	613699
98119.8	689267	460621
99042.1	178034	301521
159157	332626	491897
	394050	407850
	456124	601949
	352152	201212
	455282

## Sheet: Figure4- figure supplement 1D
WT				Drd KO				Piezo KO
Set #	Day with events	# of flies dead		Set #	Day with events	# of flies dead		Set #	Day with events	# of flies dead
1	1	0		1	1	0		1	1	0
	2	0			2	1			2	0
	3	0			2	1			3	0
	4	0			2	1			4	0
	5	0			2	1			5	0
	6	0			3	1			6	0
	7	0			3	1			7	0
	8	0			4	1			8	0
	9	0			4	1			9	0
	10	0			4	1			10	0
	11	0			5	0			11	0
					6	1
2	1	0			6	1		2	1	0
	2	0			7	0			2	0
	3	0			8	1			3	0
	4	0							4	0
	5	0		2	1	0			5	0
	6	0			2	1			6	0
	7	0			3	1			7	0
	8	0			3	1			8	0
	9	0			3	1			9	0
	10	0			3	1			10	0
	11	0			3	1			11	0
					4	1
3	1	0			4	1		3	1	0
	2	0			4	1			2	0
	3	0			5	0			3	0
	4	0			5	1			4	0
	5	0							5	0
	6	0		3	1	0			6	0
	7	0			2	0			7	0
	8	0			3	1			8	0
	9	0			3	1			9	0
	10	0			4	1			10	0
	11	0			5	1			11	0
					5	1
4	1	0			5	1		4	1	0
	2	0			6	0			2	0
	3	0			7	1			3	0
	4	0			8	0			4	0
	5	0			9	1			5	0
	6	0			9	1			6	0
	7	0							7	0
	8	0		4	1	0			8	0
	9	0			2	1			9	0
	10	0			3	1			10	0
	11	0			4	1			11	0
					4	1
5	1	0			5	1		5	1	0
	2	0			5	1			2	0
	3	0			5	1			3	0
	4	0			5	1			4	0
	5	0			5	1			5	0
	6	0			6	0			6	0
	7	0			7	1			7	0
	8	0							8	0
	9	0		5	1	1			9	0
	10	0			2	0			10	0
	11	0			3	1			11	0
					3	1
6	1	0			3	1		6	1	0
	2	0			3	1			2	0
	3	0			4	1			3	0
	4	0			4	1			4	0
	5	0			4	1			5	0
	6	0			5	0			6	0
	7	0			6	0			7	0
	8	0			7	0			8	0
	9	0			8	1			9	0
	10	0							10	0
	11	0		6	1	0			11	0
					2	0
7	1	0			3	1		7	1	0
	2	0			4	1			2	0
	3	0			4	1			3	0
	4	0			4	1			4	0
	5	0			4	1			5	0
	6	0			5	1			6	0
	7	0			6	1			7	0
	8	0			6	1			8	0
	9	0			7	1			9	0
	10	0			8	1			10	0
	11	0			9	0			11	0
					10	0
8	1	0			11	1
	2	0
	3	0		7	1	0
	4	0			2	0
	5	0			3	1
	6	0			4	1
	7	0			4	1
	8	0			4	1
	9	0			4	1
	10	0			4	1
	11	0			5	0
					6	1
					6	1
					7	1
					8	0
					9	0
					10	1
					11	1

## Sheet: Figure4- figure supplement 1E
WT	Piezo KO	Drd KO
2.1	2.2	0.4
1.7	2	0.1
1.5	2.5	0.2
1.9	3	0.1
2.2	1.9	0
1.8	2.3	0.1
1.8	2.9	0
1.7	3.9	0.2
2	2.5	0
	2.5	0.1

## Sheet: Figure4- figure supplement 1F
WT	Piezo KO
6.648	6.295
12.542	12.728
18.613	9.417
2.909	11.722
4.958	8.806
5.775	5.689
7.016	7.592
	10.564
	6.966
	9.043

## Sheet: Figure4- figure supplement 1G
WT	Piezo KO
0.005	0.006
0.007	0.012
0.002	0.005
0.007	0.005
0.007	0.004
0.011	0.006
0.003	0.007
	0.007
	0.005
	0.004

## Sheet: Figure4- figure supplement 1H
WT	Piezo KO
39321.2	263744
34532.1	86745.8
49813.7	112238
28235.3	34258.8
74513.4	138458
453531	60468.1
71644	55925.3
57789.3	245265
91165.1	48445.1
54196.8
39300.4
49143.2
37869.9
166768
119500

## Sheet: Figure4- figure supplement 1I
Feeding index						Crop size
w1118	+>Trpa1	Piezo KO	Piezo>Trpa1	Piezo>Trpa1; Piezo KO		w1118	+>Trpa1	Piezo KO	Piezo>Trpa1	Piezo>Trpa1; Piezo KO
0.462	2.209	3.578	0.583	1.711		482791	586387	596553	173439	473439
1.3	1.727	2.333	0.75	1.533		353689	279934	990502	178805	278805
1.25	1.889	2.889	0.833	0.385		423039	425624	758342	92241.8	52241.8
1.727	1.889	2.667	1.091	0.636		670280	903614	768736	154514	24513.5
1.7	1.583	3.167	1.625	1.167		188400	114502	650983	146474	135354
2	1.417	2.182	1.167	1.15		206345	203614	665030	50128.3	49017.2
1.818	1.75	2.25	1.667	1.09		258634	476603	116622	101343	121343
1.455	1.444	2.538	0.889	1.125		676603	677163	354378	105464	95464
1.667	1.769	1.917	1.333	1.083		126414	273948	1280491	76516.5	276516
1.625	1.818	1.118	1.091	0.8		246609	368504	652603	123128	132361
1.833	1.636	2.571	0.923	1.154		220787	259963	1046102	73439.1	53535.3
1.818	1.833	2.364	1.075	1		505998	203614	886820	373439	70056.2
1.833	2.036	3.171	1.3	0.846
1.6	1.883	3.273	1.222	1.357
	1.012	1.816	1.121	1.286
				1.667
				1.433
				1.417
				1.38
				1.333

## Sheet: Figure4- figure supplement 1J
Feeding index						Crop size
WT	Esg>+	Piezo KO	Esg>Piezo-GFP; Piezo KO	Esg>+;Piezo KO		WT	Esg>+	Piezo KO	Esg>Piezo-GFP; Piezo KO	Esg>+;Piezo KO
1.909	1.9	2.667	2.154	2.455		151538	105657	505949	833859	709075
1.75	1.583	2.538	2.172	2.933		518941	153453	442518	246871	544726
1.917	0.818	2.417	2.333	2.499		577142	177374	385557	480557	756461
1.636	1.455	2.9	2.636	3.111		172691	254875	571140	296250	576981
1.727	1.333	2.455	2.273	2.5		258866	185811	397569	452025	569842
1.5	1.455	2.054	2	1.955		222276	247634	365587	1018847	244309
1.417	1.833	1.442	2.083	2.417		428573	69531	661931	456557	442917
1.583	1.417	2.215	1.615	2.167		248802	358095	310037	901775	1180778
1.417	1.367	2.727	2.35	2.583		123498	232665	718245	348203	391159
1.75						81093.3	58783.1	353666	209549	411379
						157408	46350.2	592431	396658
						350166	177330	94203.2	683634
						251529	221618	827615	94203.2
						346813	453668	1022709	427615
						63073.5		757001	322709
						60202.1		770067	457001
						622233

## Sheet: Figure 4-figure supplement 2A
Male			Female
WT	Piezo KO	Piezo KO/+	WT	Piezo KO	Piezo KO/+
1.1667	1.5385	1.3	1.5057	2.3845	1.25
1	1.8889	1.3333	1.5852	2.4299	1.4333
1.1818	1.8889	1.3333	1.8	2.5455	1.475
1.1818	1.5455	1.1667	1.5581	2.5909	1.5341
1.0833	1.5455	1.0909	1.7008	1.9394	1.8182
1.11111	2.1		2.0909	2.93636	1.33333
1.90909	2.27273		1.7	2.66667	1.16667
	2.16667		1.81818	2.5	1.7
			1.5	2.36364	1.25
			1.5	2.08333	1.81818
			1.58333	2.45454
			1.66667	2.63636
			1.27273	2.54546
