# Supplementary material for: The treaty of Versailles, 80 years on.
Source: eLife journal article supplement (doi:10.7554/elife.63049), 2001-04-01
Supplement: supp [file elife-63049-supp-v1.zip › elife_poa_e63049_Figure_4_figure_supplement_2_source_data_1.xlsx]

## Sheet: Figure 4-figure supplement 2A
Male			Female
WT	Piezo KO	Piezo KO/+	WT	Piezo KO	Piezo KO/+
1.1667	1.5385	1.3	1.5057	2.3845	1.25
1	1.8889	1.3333	1.5852	2.4299	1.4333
1.1818	1.8889	1.3333	1.8	2.5455	1.475
1.1818	1.5455	1.1667	1.5581	2.5909	1.5341
1.0833	1.5455	1.0909	1.7008	1.9394	1.8182
1.11111	2.1		2.0909	2.93636	1.33333
1.90909	2.27273		1.7	2.66667	1.16667
	2.16667		1.81818	2.5	1.7
			1.5	2.36364	1.25
			1.5	2.08333	1.81818
			1.58333	2.45454
			1.66667	2.63636
			1.27273	2.54546
