# Supplementary material for: The treaty of Versailles, 80 years on.
Source: eLife journal article supplement (doi:10.7554/elife.63049), 2001-04-01
Supplement: supp [file elife-63049-supp-v1.zip › elife_poa_e63049_Figure_4_source_data_1.xlsx]

## Sheet: Figure 4C
Feeding index			Crop size
WT	Piezo KO		WT	Piezo KO
1.182	2.25		482791	596553
1.333	2.909		361308	890502
1.3	1.778		353689	818342
1.75	2.889		423039	668736
2.25	2.333		170280	650983
2	2.6		188400	665030
1.727	2.051		206345	876622
1.455	2.192		258634	314378
1.818	2.364		596603	980491
1.667	3.283		126414	552603
1.506	2.385		207086	646102
1.585	2.43		246609	586820
1.558	2.546		223284	705998
1.701	2.091		220787	414378
0.917	1.667
0.917	2.3
1.25	2.57

## Sheet: Figure 4D
WT_male	Piezo KO_male	WT_female	Piezo KO_female
0.8	0.9	1.233	1.767
0.833	0.867	1.267	1.467
0.9	0.933	1.067	1.867
0.833	0.833	1.1	1.767
0.867	0.933	1.2	1.633
0.8	0.867	1.267	1.6
0.933	0.867	1.2	1.55
0.967	0.933	1.2	1.367
0.833	0.967	1.167	1.167
0.867	1	1.2	1.167
0.9	0.967	1.333	1.4
0.833	1.033	0.967	1.4
0.933	0.967	1.167	1.3
0.867	0.967	1	1.2
0.933	1.033	1.033	1.2
0.733	1.067	1.033	1.267
0.767	1	1.167	1.3
0.733	0.9	1.1	1.267
0.767	0.9	1.2	1.3
0.8	0.867	1.2	1.3
0.7	0.867	1.2	1.333
0.667	0.967	1.267	1.333
0.7	0.833	1.2	1.367
0.8	0.833	1.167	1.367
0.9	0.833	1.133	1.233
0.9	1	1.133	1.333
0.8	1	1.1	1.433
0.867	0.967	1.133	1.367
0.767	0.933	1.367	1.633
0.8	1.1	1.167	1.511
0.8	1	1.2	1.667
0.85	1.067	1.167
	1.1	1.133
	1.1

## Sheet: Figure 4E
Consumption (nl)			Feeding duration (sec)			Feeding bouts
WT	Piezo KO		WT	Piezo KO		WT	Piezo KO
30.597	34.77		34	45		2	2
57.055	50.409		42	47		4	1
15.602	37.423		16	44		2	1
23.801	50.743		15	54		3	4
11.658	36.642		12	36		1	2
22.844	43.324		21	43		2	1
17.457	39.886		14	30		1	2
19.167	25.732		16	26		2	1
22.977	26.652		19	32		2	1
16.883	32.645		15	34		1	2
8.305	50.467		4	40		1	2
33.889	16.978		26	23		2	2
9.336	61.042		9	63		1	2
20.041	22.668		17	27		2	1
23.002	27.116		36	24		1	3
32.489	28.555		30	31		2	1
40.327	51.817		45	43		3	2
9.249	29.502		9	23		1	2
39.808	69.922		50	57		4	2
11.135	71.653		11	61		1	2
23.268	35.568		34	49		2	2
	45.241			52			2

## Sheet: Figure 4F
Feeding index						Crop size
WT	Piezo>+	Piezo KO	Piezo>Piezo-GFP; Piezo KO	Piezo>Piezo-GFP		WT	Piezo>+	Piezo KO	Piezo>Piezo-GFP; Piezo KO	Piezo>Piezo-GFP
1.25	1.357	2.444	1.667	2.125		157826	657826	668438	615330	47325.4
1.333	1.083	2.125	2	2.25		224985	104985	784320	112798	52068.8
1.833	0.1	2.5	1.462	1.714		530231	130231	529004	165849	376677
1.538	1.786	2.333	1.273	1.5		257826	312798	661588	93682.6	54602.9
1.538	1.538	2	0.5	0.375		206985	65733.3	659112	180996	81599.3
2.1	1.667	2.111	1.308	1.7		400231	45849.3	922519	190596	112714
1.667	0.8	2.429	1.714	1.222		312798	457826	204985	122724	49551.3
1.5	1.357	2.769	2.125	2.1		165849	144985	417176	523126	659403
2	1.083	3	2.25	0.833		207826	135231	579616	633017	246039
1.515	2.909	1.9	1.933	0.909		252985	202798	580203	317071	287018
1.545	1.4	2.125	2.181	1.636		430231	150798	869209	320359	536732
1.909	1.417	2.4	1.583	0.364		352798	410231	608946	452009	65628.4
1.545	1.7	2.182	1.167	1		85849.3	272985	352028	78663.3	718795
1.727	1.455	2.273	1.333	0.818					72897.6	46440.5
1.417	1.182	1.909	1	0.273					476513	71158.9
1.167	1.75	2.333	1.4	1					418266	77488.9
0.5	0.754	2.6	1.214	1.692					256296
0.909	0.345	1.231	0.25	1.727					289800
0.462	1.583	1.417	1.4	1.182
0.667	1.273	1.545	1.556	1.6
1	1.583	1.8		1.182
1.909	1.5	1.3		1.455
2.083		2.5
1.833		2.833
1.917		2.255
0.833		2.275
1.667		2.111
1.417		2.666
1.373		2.045
		2
