# Supplementary figures and images for: The treaty of Versailles, 80 years on.
Source: eLife journal article supplement (doi:10.7554/elife.63049), 2001-04-01

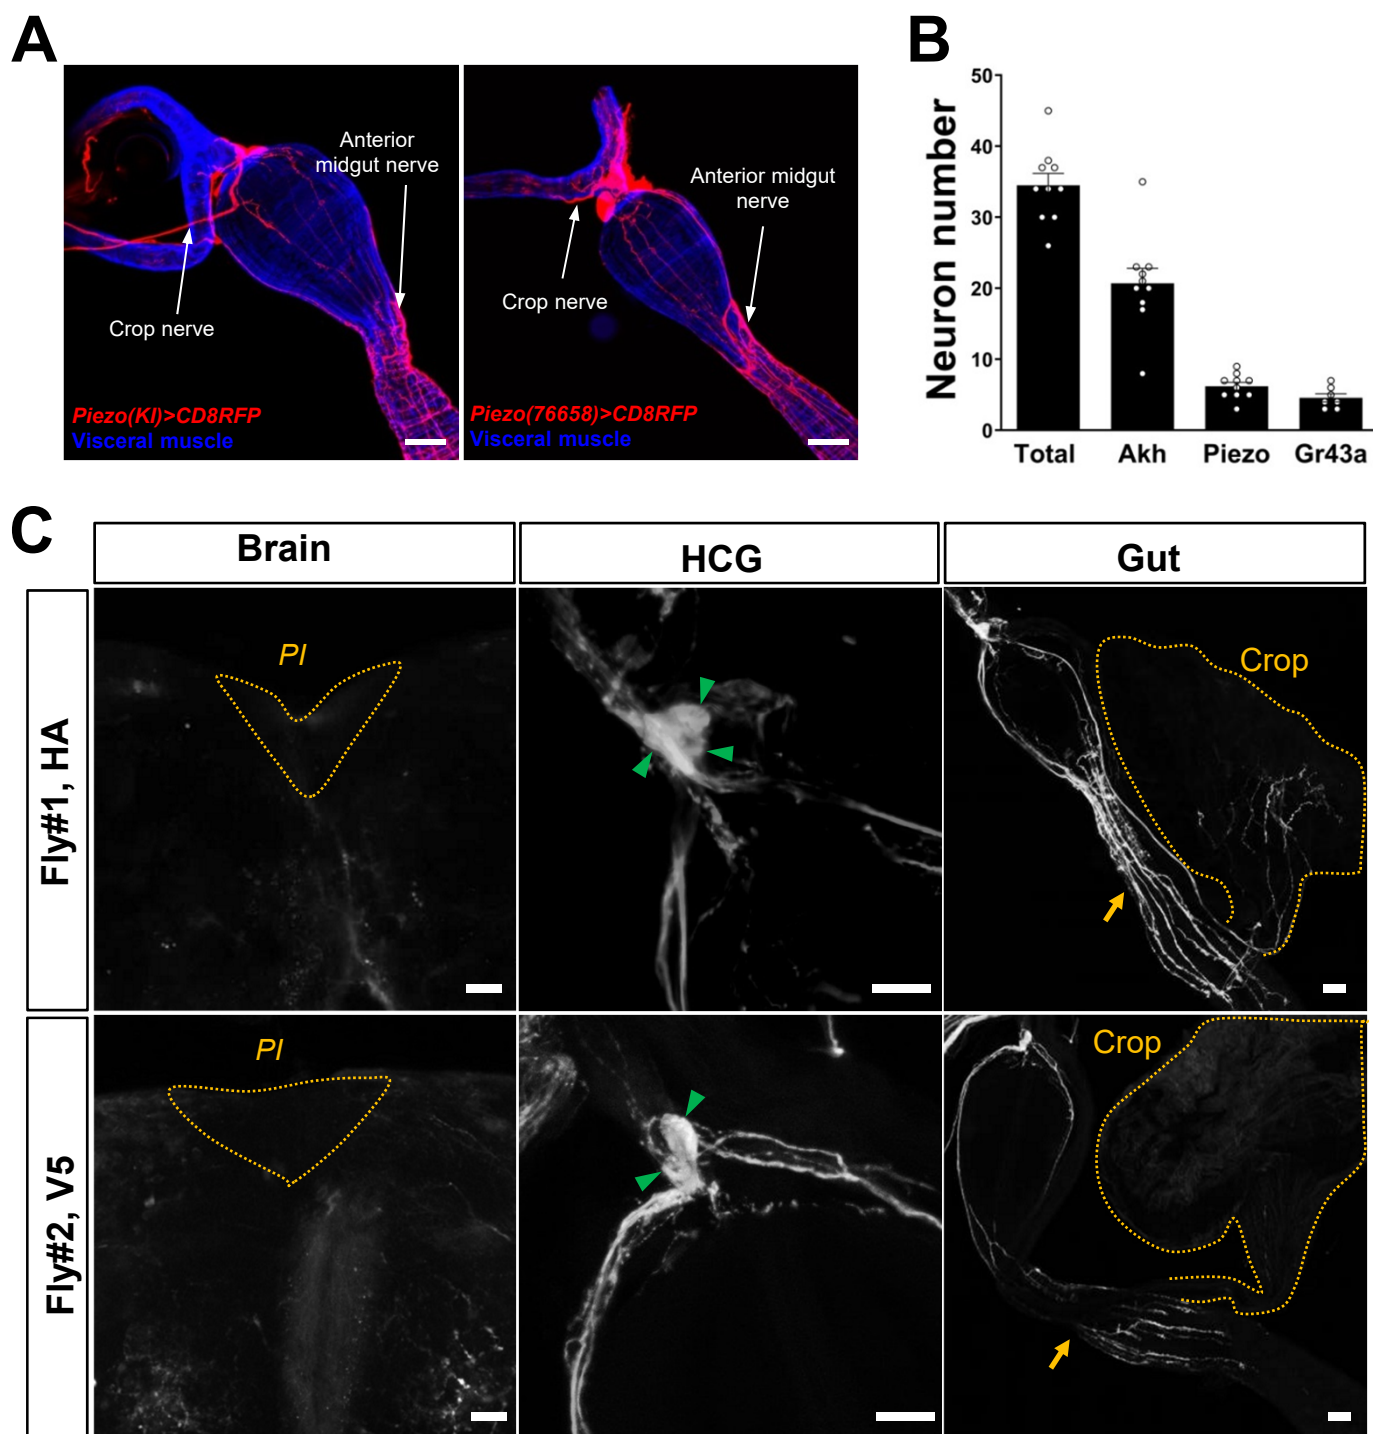

**Figure 1 - figure supplement 1**

Supplement: supp [file elife-63049-supp-v1.zip › elife_poa_e63049_Figure_1_figure_supplement_1.pdf]

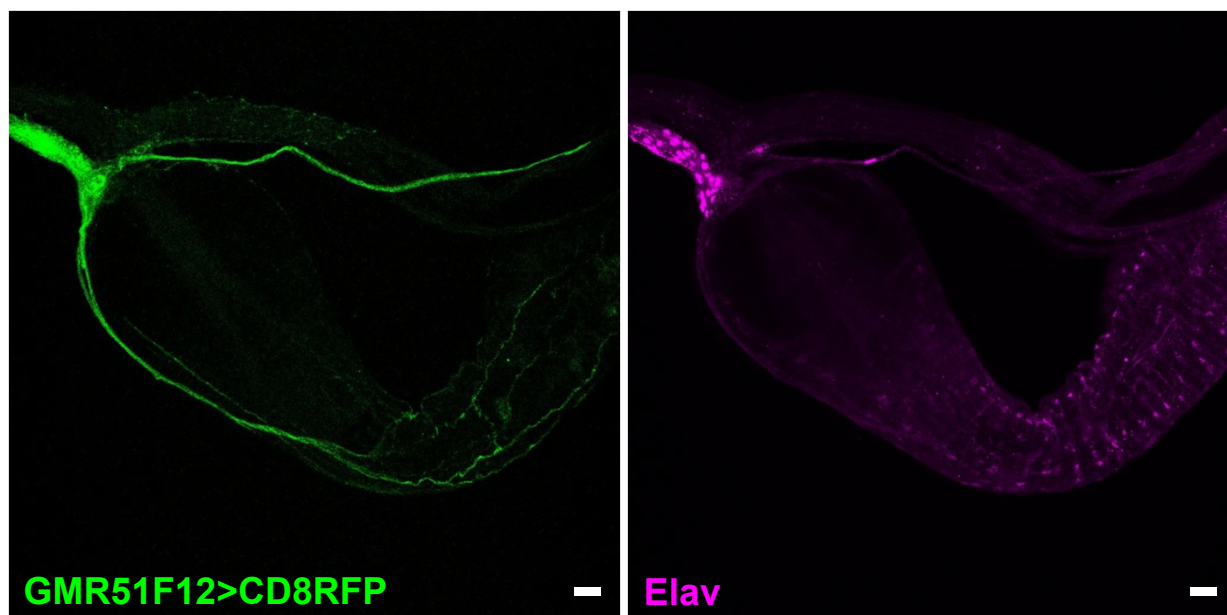

**Figure 2 - figure supplement 1**

Supplement: supp [file elife-63049-supp-v1.zip › elife_poa_e63049_Figure_2_figure_supplement_1.pdf]

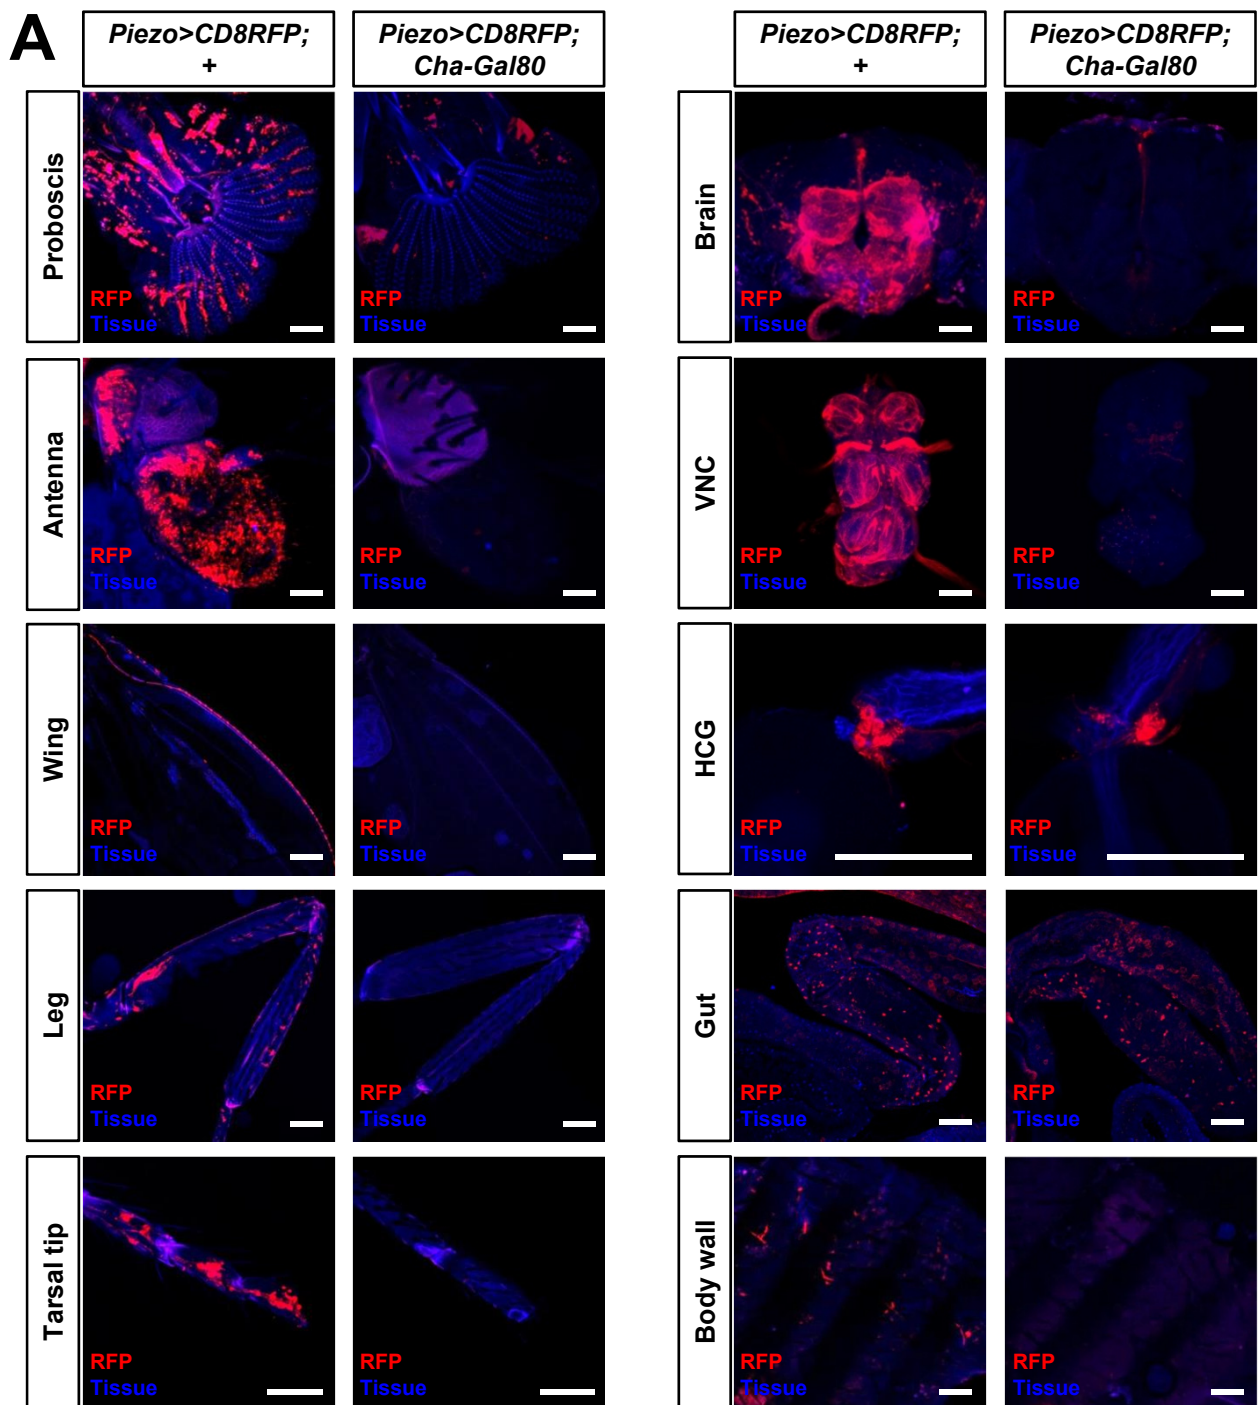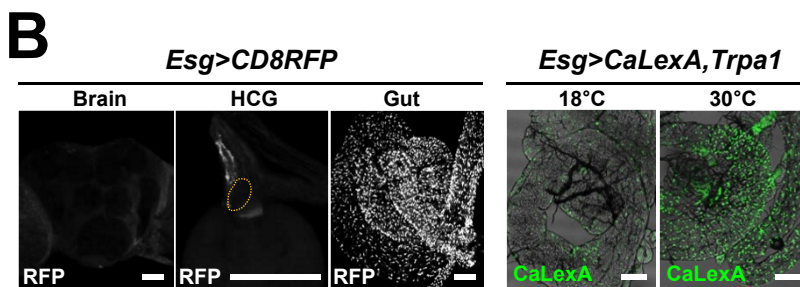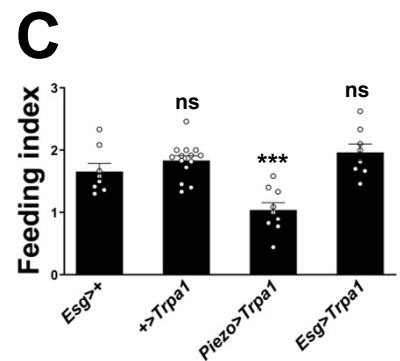

**Figure 2 - figure supplement 2**

Supplement: supp [file elife-63049-supp-v1.zip › elife_poa_e63049_Figure_2_figure_supplement_2.pdf]

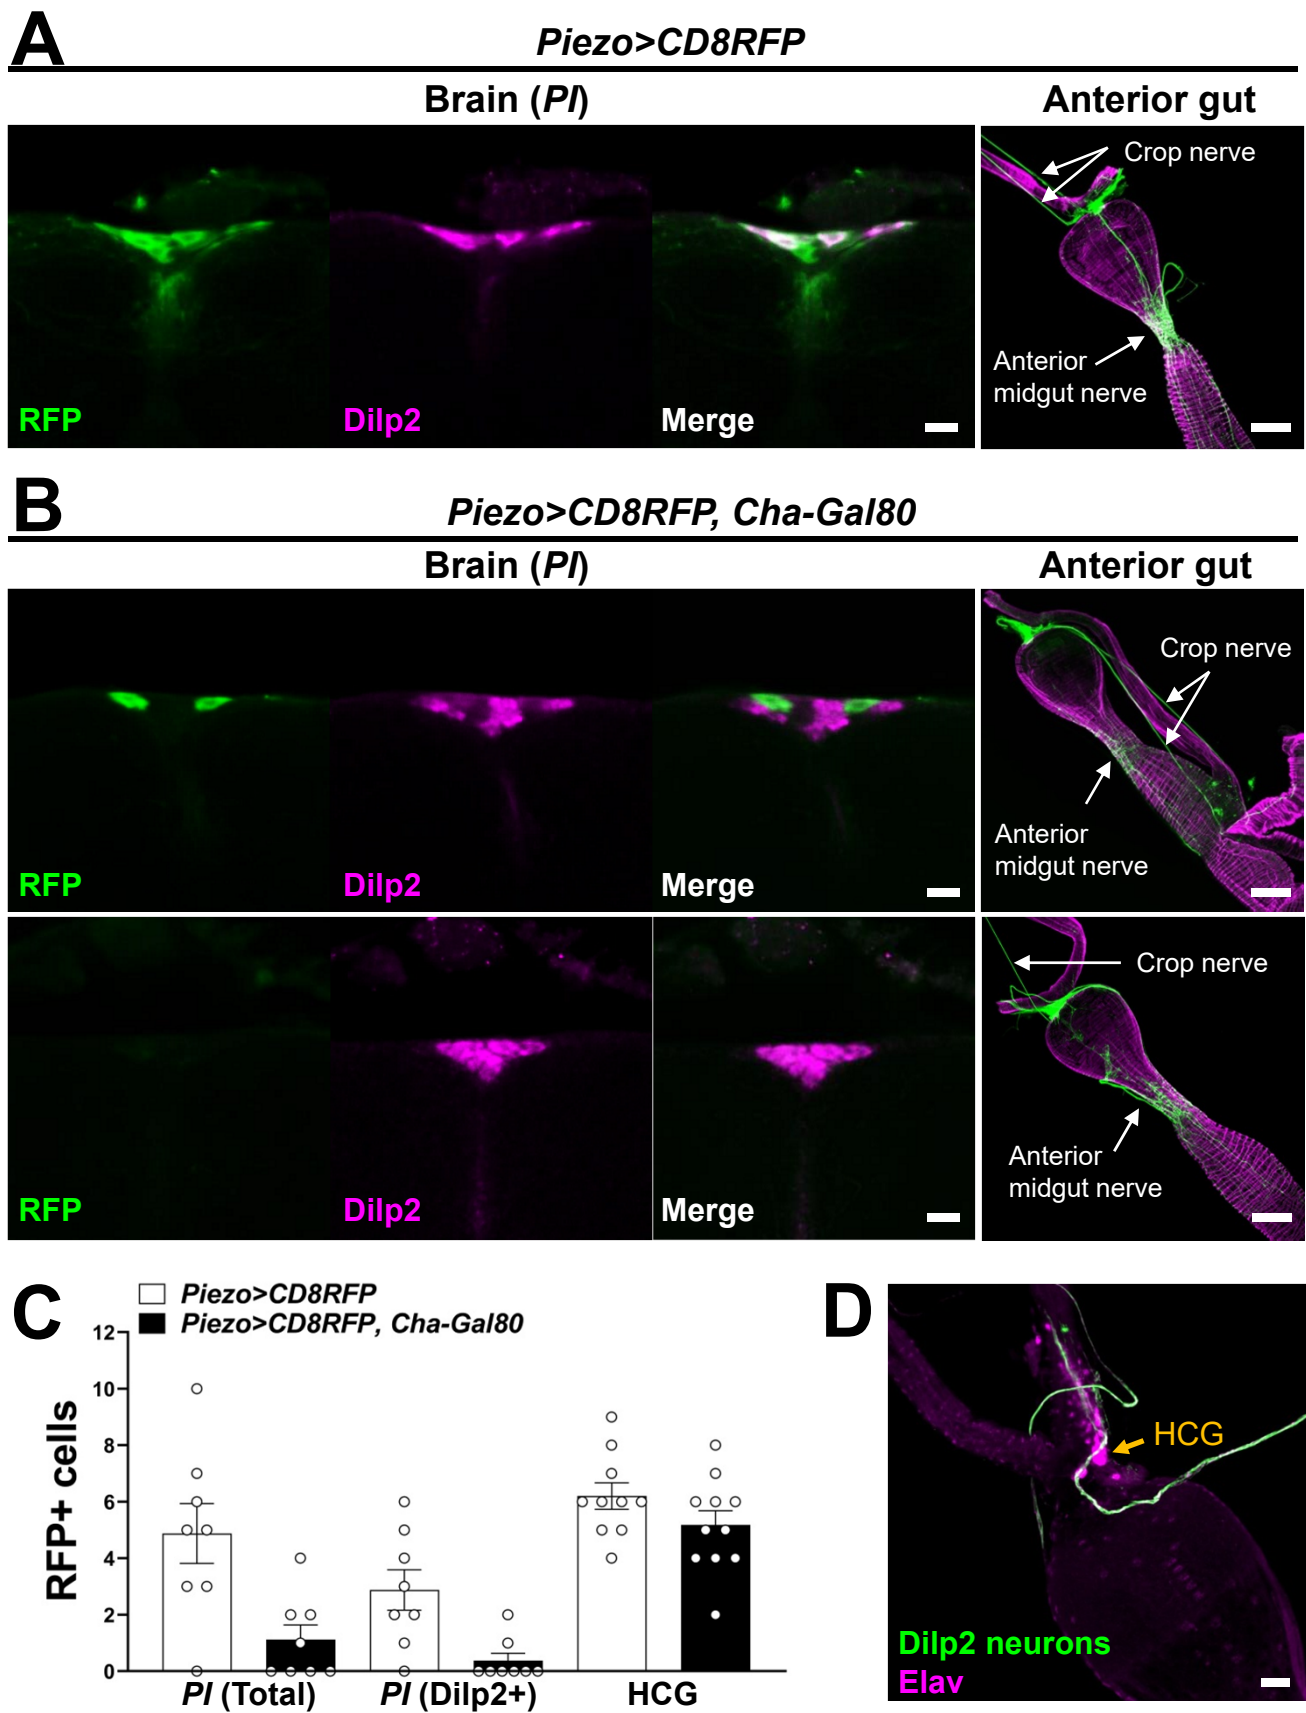

Figure 2 - figure supplement 3

Supplement: supp [file elife-63049-supp-v1.zip › elife_poa_e63049_Figure_2_figure_supplement_3.pdf]

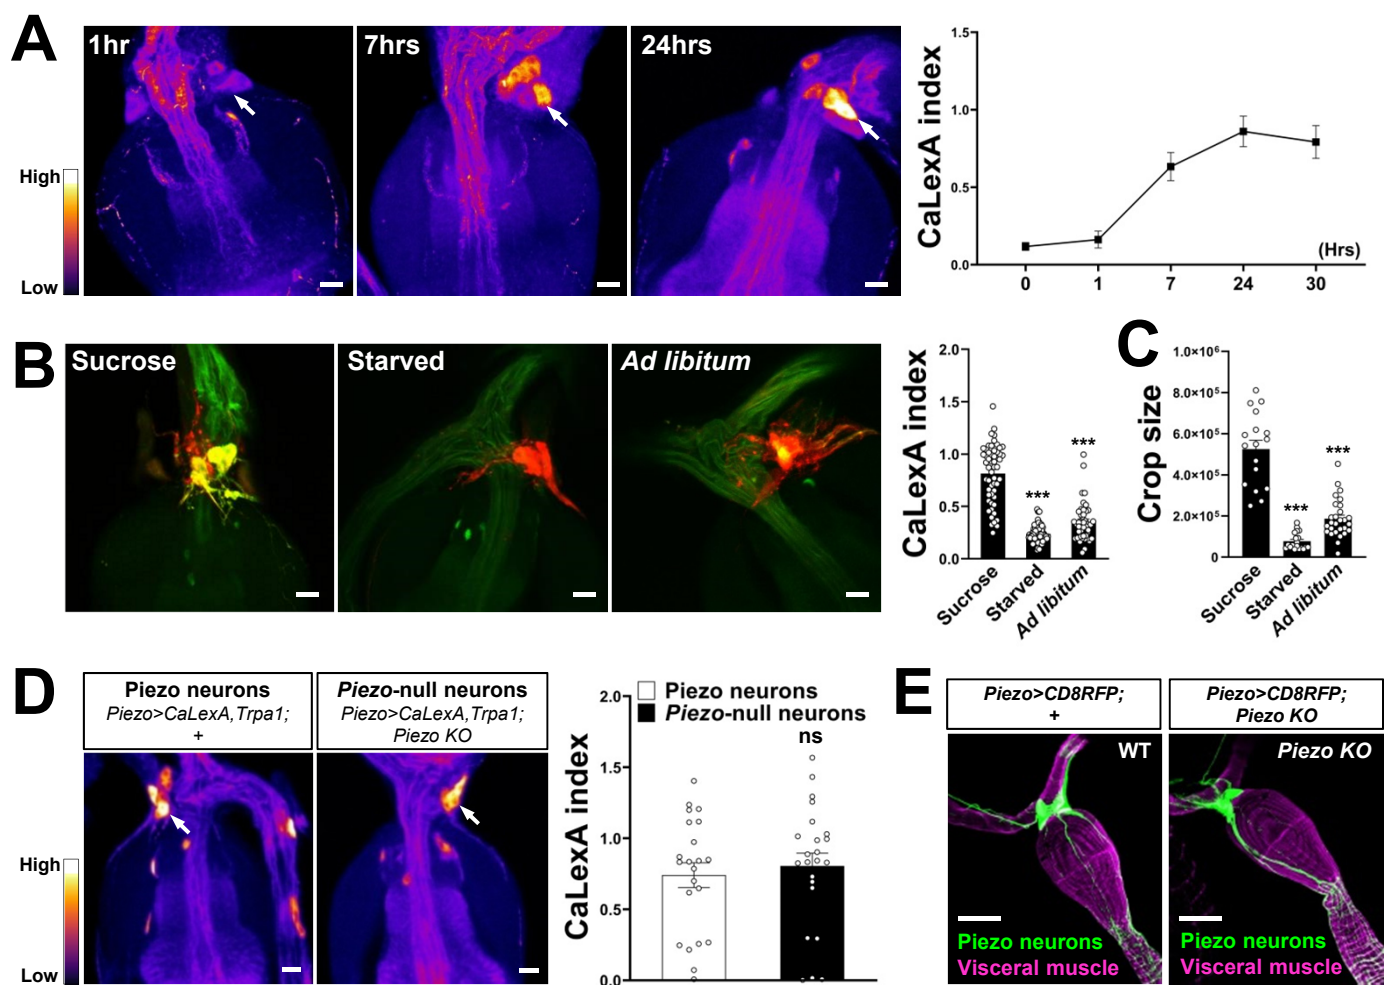

Figure 3 - figure supplement 1

Supplement: supp [file elife-63049-supp-v1.zip › elife_poa_e63049_Figure_3_figure_supplement_1.pdf]

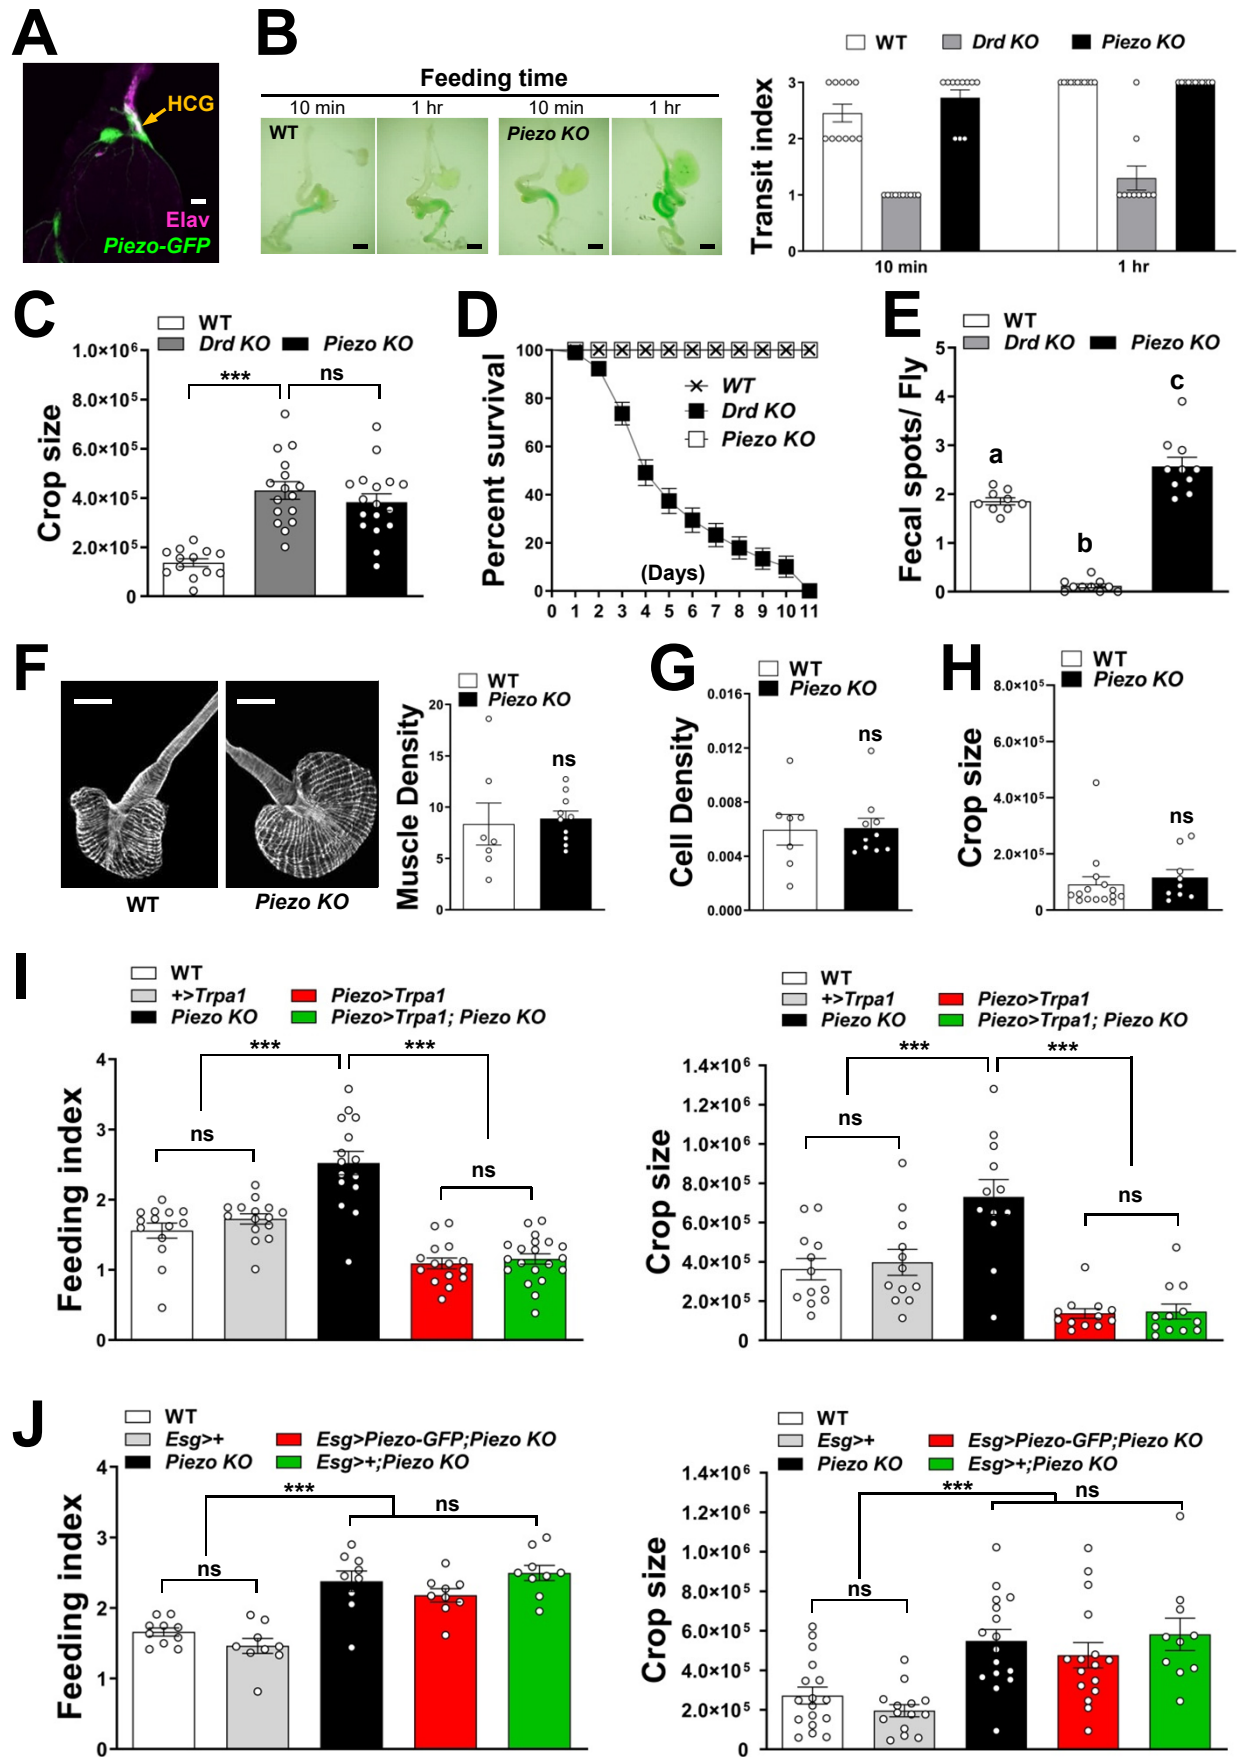

Figure 4 - figure supplement 1

Supplement: supp [file elife-63049-supp-v1.zip › elife_poa_e63049_Figure_4_figure_supplement_1.pdf]

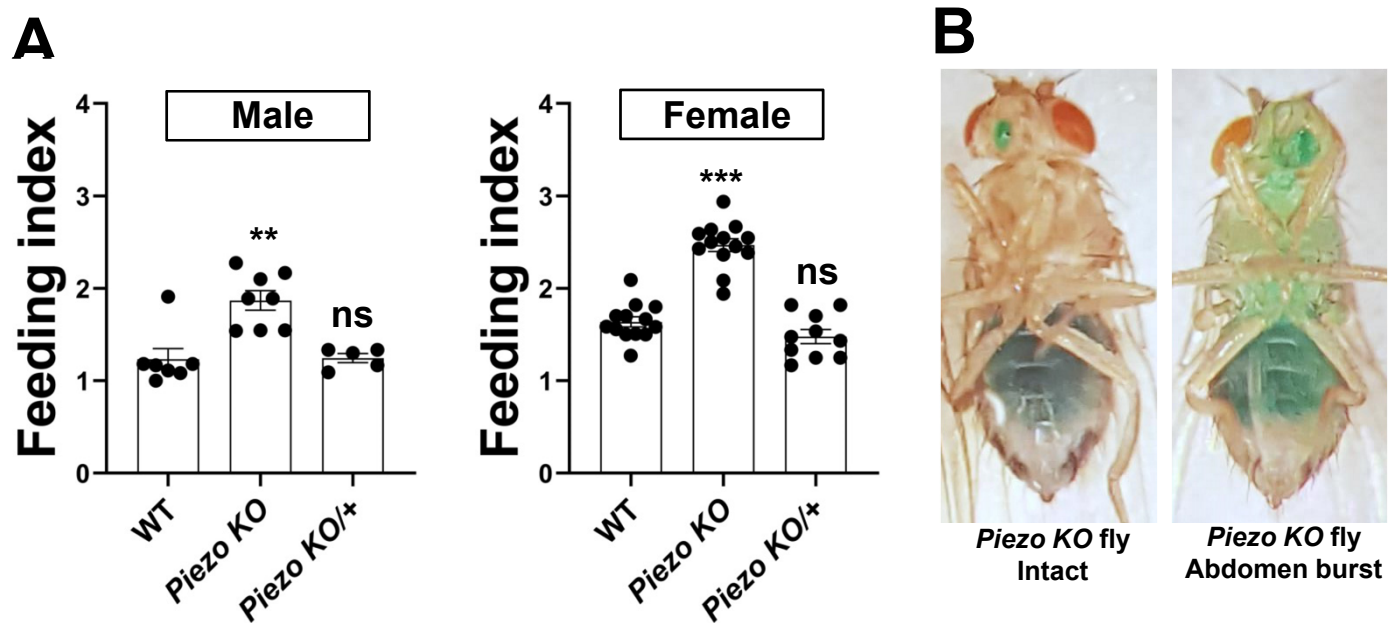

**Figure 4 - figure supplement 2**

Supplement: supp [file elife-63049-supp-v1.zip › elife_poa_e63049_Figure_4_figure_supplement_2.pdf]
